# Supplementary material
Source: publisher figshare collection journal article supplement (https://asha.figshare.com/articles/dataset/_/24018732)
Supplement: Supplementary file 1 [file 1]

**Supplemental Material S2.** Quality assessment of included studies using the Mixed Methods Appraisal Tool (Hong et al., 2018).

| Article                    | Study Type               | Criteria 1 | Criteria 2 | Criteria 3 | Criteria 4 | Criteria 5 |
|----------------------------|--------------------------|------------|------------|------------|------------|------------|
| Baxter et al. (2009)       | Quantitative Descriptive | Y          | -          | -          | N          | -          |
| Beck & Dennis (1997)       | Quantitative Descriptive | Y          | -          | -          | -          | -          |
| Bland (1995)               | Quantitative Descriptive | Y          | -          | Y          | -          | Y          |
| Dohan & Schulz (1998)      | Quantitative Descriptive | Y          | Y          | Y          | -          | -          |
| Elksnin & Capilouto (1994) | Quantitative Descriptive | Y          | -          | -          | Y          | -          |
| Fallon (2011)              | Quantitative descriptive | Y          | Y          | N          | N          | Y          |
| Glover et al. (2015)       | Qualitative              | Y          | -          | Y          | -          | -          |
|                            | Quantitative Descriptive | Y          | N          | Y          | N          | -          |
|                            | Mixed Methods            | Y          | Y          | Y          | Y          | Y          |
| Huffman (2020)             | Quantitative Descriptive | Y          | N          | Y          | -          | Y          |
| Jago & Radford (2017)      | Qualitative              | Y          | Y          | -          | Y          | Y          |
| McKenna et al. (2021)      | Quantitative Descriptive | -          | -          | Y          | -          | Y          |
| Pershey & Rapking (2003)   | Quantitative Descriptive | -          | Y          | -          | -          | -          |
| Pfeiffer et al. (2019)     | Quantitative Descriptive | Y          | -          | Y          | -          | Y          |
| Reid et al. (1996)         | Qualitative              | Y          | -          | -          | N          | N          |

|                             |                          |   |   |   |   |   |
|-----------------------------|--------------------------|---|---|---|---|---|
|                             | Quantitative Descriptive | Y | Y | - | - | - |
|                             | Mixed Methods            | Y | - | - | - | - |
| Serry (2013)                | Qualitative              | Y | - | - | Y | Y |
| Shaughnessy & Sanger (2005) | Quantitative Descriptive | Y | Y | Y | - | Y |
| Shelton (2018)              | Qualitative              | Y | - | Y | - | - |
|                             | Quantitative Descriptive | - | - | - | - | - |
|                             | Mixed Methods            | - | - | - | - | - |
| Wallace et al. (2022)       | Quantitative Descriptive | Y | Y | - | - | Y |
| Wright & Graham (1997)      | Quantitative Descriptive | - | - | N | - | - |

**Note.** **Y** Criteria fulfilled; **N** Criteria not fulfilled; - Unable to determine if criteria were fulfilled based on study description
