# Supplementary material
Source: publisher figshare collection journal article supplement (https://asha.figshare.com/articles/dataset/_/24018732)
Supplement: Supplementary file 2 [file 1]

**Supplemental Material S1.** Database search strategy to identify studies.

| Database | Search Dates                                                                    | Limits             | Search Terms                                                                                                                                                                                                                                                                                                                                                                                                                                                                                                                                                                                                                                                                                                                                                                                                                                                                                                                                                                                                                                                                                                                                                                                                                                                                                                                                                                                                                                                                                                                                            |
|----------|---------------------------------------------------------------------------------|--------------------|---------------------------------------------------------------------------------------------------------------------------------------------------------------------------------------------------------------------------------------------------------------------------------------------------------------------------------------------------------------------------------------------------------------------------------------------------------------------------------------------------------------------------------------------------------------------------------------------------------------------------------------------------------------------------------------------------------------------------------------------------------------------------------------------------------------------------------------------------------------------------------------------------------------------------------------------------------------------------------------------------------------------------------------------------------------------------------------------------------------------------------------------------------------------------------------------------------------------------------------------------------------------------------------------------------------------------------------------------------------------------------------------------------------------------------------------------------------------------------------------------------------------------------------------------------|
| PubMed   | Initial: 2020, May 01<br><br>Updated: 2022, Jan 12<br><br>Updated: 2023, Jan 30 | Title and Abstract | ((classroom) OR school)) AND (((((((((((((((((((((((("interprofessional relationship") OR "Interprofessional experience"[All Fields]) OR "Collaborative partners"[All Fields]) OR "Collaborative process"[All Fields]) OR "Collaborative approach"[All Fields]) OR "interprofessional relations"[All Fields]) OR "interprofessional relations"[MeSH Terms]) OR "interprofessional collaborative practice"[All Fields]) OR "professional collaboration"[All Fields]) OR "interprofessional cooperation") OR "collaborative consultation"[All Fields]) OR Teamwork[All Fields]) OR "collaborative practice"[All Fields]) OR collaborative[All Fields]) OR "collaborative service delivery"[All Fields]) OR Partnerships[All Fields]) OR Partnership[All Fields]) OR interprofessional[All Fields]) OR "working together"[All Fields]) OR "interprofessional collaboration"[All Fields]) OR collaboration[All Fields])) AND (((((((((((speech-language pathologist*) OR Speech-language therapy) OR "Speech-language therapy") OR "speech therapy"[MeSH Terms]) OR "speech therapy"[All Fields]) OR "speech-language pathology"[MeSH Terms]) OR "speech-language pathology"[All Fields]) OR "speech pathology"[All Fields]) OR Speech-language therapist*) OR Speech pathologist*) AND (((((((((((teachers) OR "General educator") OR "Classroom teacher") OR "Classroom teacher"[All Fields]) OR teacher) OR Educators) OR "school teachers"[MeSH Terms]) OR "school teachers"[All Fields]) OR "school teacher"[All Fields]) OR "education personnel")))) |
| EMBASE   | Initial: 2020, May 04<br><br>Updated: 2022, Jan 12<br><br>Updated: 2023, Jan 30 |                    | 'speech therapists' 'speech therapist'/exp OR 'speech therapist' 'speech pathologists' 'speech pathologist' 'speech language therapists' 'speech language therapist'/exp OR 'speech language therapist' 'speech pathology' 'speech language pathology'/exp OR 'speech language pathology' 'speech therapy'/exp OR 'speech therapy' 'speech language therapy'/exp OR 'speech language therapy' 'speech language pathologists' 'speech language pathologist'/exp OR 'speech language pathologist' AND 'teacher'/exp OR 'teacher' 'teachers'/exp OR 'teachers' 'general educator' 'classroom teacher' 'educators' 'school teachers'/exp OR 'school teachers' 'school teacher'/exp OR 'school teacher' 'education personnel' 'classroom teachers' AND 'education setting' 'classroom'/exp OR classroom 'schools'/exp OR schools 'school'/exp OR school AND 'collaboration'/exp OR collaboration 'interprofessional collaboration'/exp OR 'interprofessional collaboration' 'working together' 'interprofessional'/exp OR 'interprofessional' 'partnership'/exp OR 'partnership' 'partnerships' 'collaborative service delivery' 'collaborative'                                                                                                                                                                                                                                                                                                                                                                                                             |

| 'collaborative practice' 'teamwork'/exp OR 'teamwork' collaboration' 'interprofessional collaborative practice' |                                                                                          |                                                                                                                                                                                                                                                                                                                                                                                                                                                                                                                                                                                                                                                                                                                                                                                                                                                                                                                                                                                                                                                                                                                           |
|-----------------------------------------------------------------------------------------------------------------|------------------------------------------------------------------------------------------|---------------------------------------------------------------------------------------------------------------------------------------------------------------------------------------------------------------------------------------------------------------------------------------------------------------------------------------------------------------------------------------------------------------------------------------------------------------------------------------------------------------------------------------------------------------------------------------------------------------------------------------------------------------------------------------------------------------------------------------------------------------------------------------------------------------------------------------------------------------------------------------------------------------------------------------------------------------------------------------------------------------------------------------------------------------------------------------------------------------------------|
| Cochrane                                                                                                        | Initial: 2020,<br>May 08<br><br>Updated: 2022,<br>Jan 12<br><br>Updated: 2023,<br>Jan 19 |                                                                                                                                                                                                                                                                                                                                                                                                                                                                                                                                                                                                                                                                                                                                                                                                                                                                                                                                                                                                                                                                                                                           |
| ERIC                                                                                                            | Initial: 2020,<br>May 09<br><br>Updated: 2022,<br>Jan 12<br><br>Updated: 2023,<br>Jan 26 | ("interprofessional relationship" OR "interprofessional experience" OR "collaborative partners" OR "collaborative process" OR "collaborative approach" OR "interprofessional relations" OR "interprofessional collaborative practice" OR "professional collaboration" OR "interprofessional cooperation" OR "collaborative consultation" OR "teamwork" OR "collaborative practice" OR "collaborative" OR "collaborative service delivery" OR "partnerships" OR "partnership" OR "interprofessional" OR "working together" OR "interprofessional collaboration" OR "collaboration") AND ("school" OR "schools" OR "classroom") AND ("classroom teachers" OR "education personnel" OR "school teacher" OR "school teachers" OR "educators" OR "classroom teacher" OR "general educator" OR "teachers" OR "teacher") AND ("speech language pathologists" OR "speech language therapy" OR "speech therapy" OR "speech language pathology" OR "speech pathology" OR "speech language therapist" OR "speech language therapists" OR "speech pathologist" OR "speech pathologists" OR "speech therapist" OR "speech therapists") |
| CINAHL                                                                                                          | Initial: 2020,<br>May 10<br><br>Updated: 2022,<br>Jan 27<br><br>Updated: 2023,<br>Jan 18 | Title and<br>Abstract                                                                                                                                                                                                                                                                                                                                                                                                                                                                                                                                                                                                                                                                                                                                                                                                                                                                                                                                                                                                                                                                                                     |

---

|                                                   |                           |       |
|---------------------------------------------------|---------------------------|-------|
| ProQuest<br>dissertations<br>and theses<br>global | Initial: 2020,<br>May 11  | Title |
|                                                   | Updated: 2022,<br>Jan, 26 |       |
|                                                   | Updated: 2023,<br>Jan 18  |       |

---
